# Supplementary material for: Comparing a deep eutectic solvent (DES) to a hydrotrope for their ability to enhance the fractionation and enzymatic hydrolysis of willow and corn stover
Source: Royal Society of Chemistry journal article supplement (doi:10.1039/c8se00617b), 2019-01-01

**Figure S1**  $^{31}\text{P}$ -NMR analysis spectra of lignin isolated from controls and DES/*p*-TsOH treated biomass. (N-hydroxy-5-norbornene-2,3-dicarboximide as internal standard, 150-133 ppm). Abbreviations W: Willow; C: Corn stover; P: *p*-toluensulfonate; D: betaine:lactic acid deep eutectic solvent. Numbers denote temperature of applied treatment.

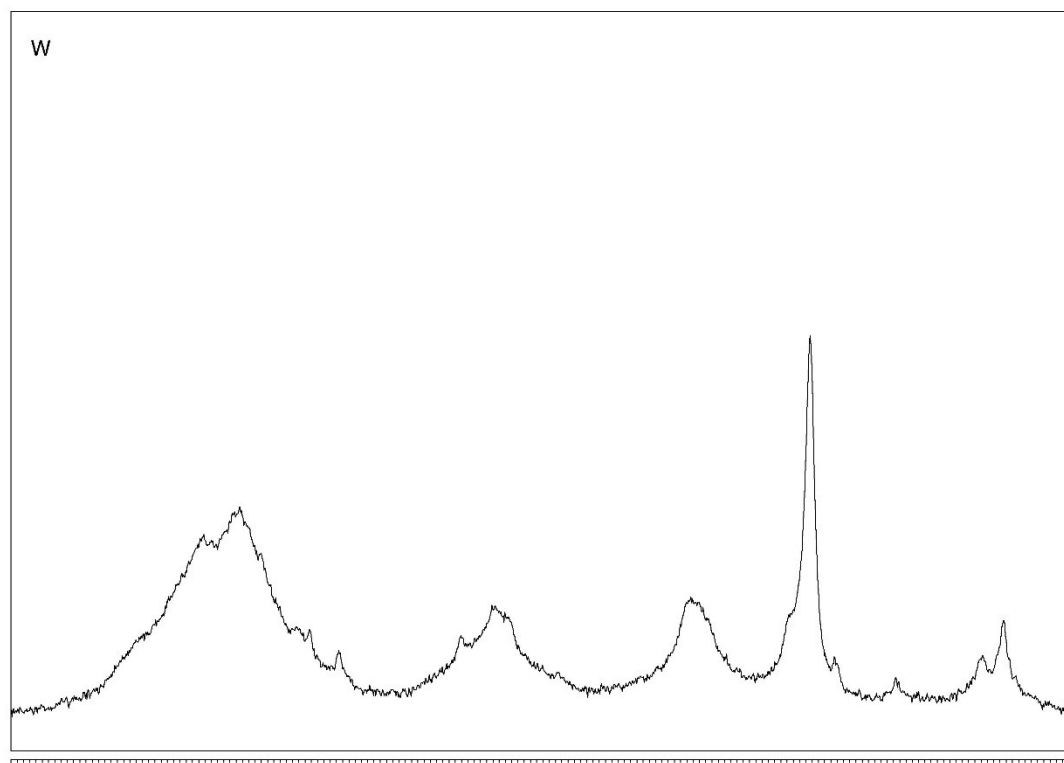

C

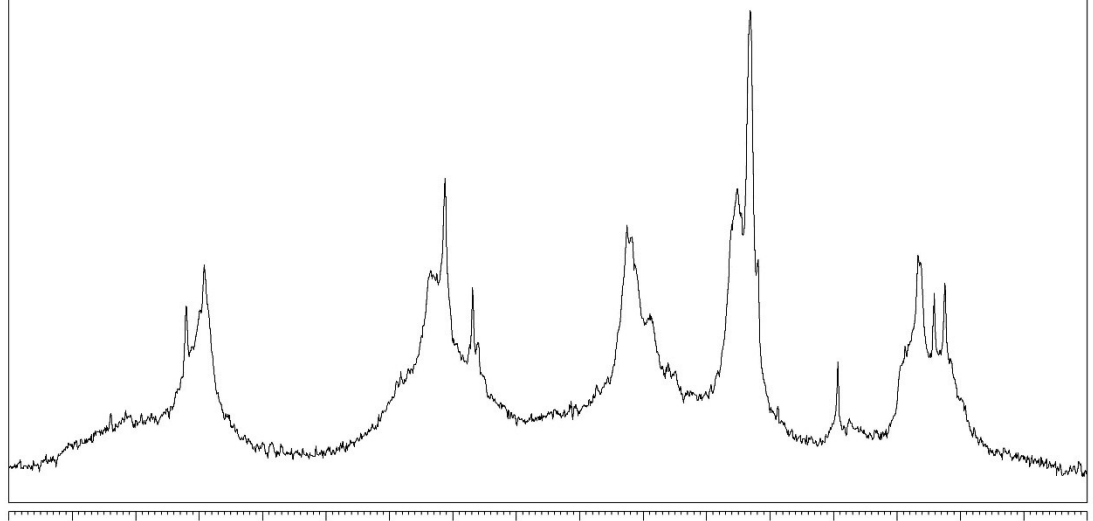

140PW

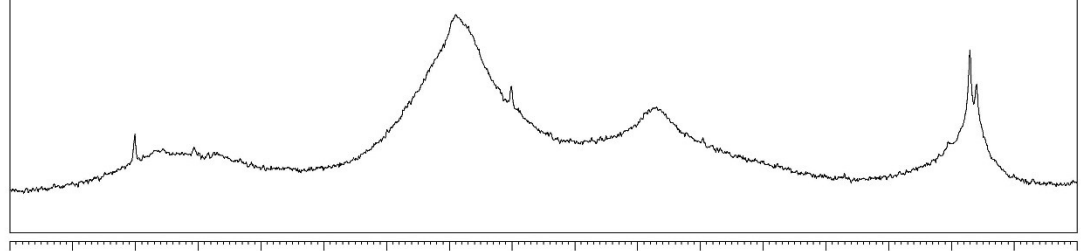

140PC

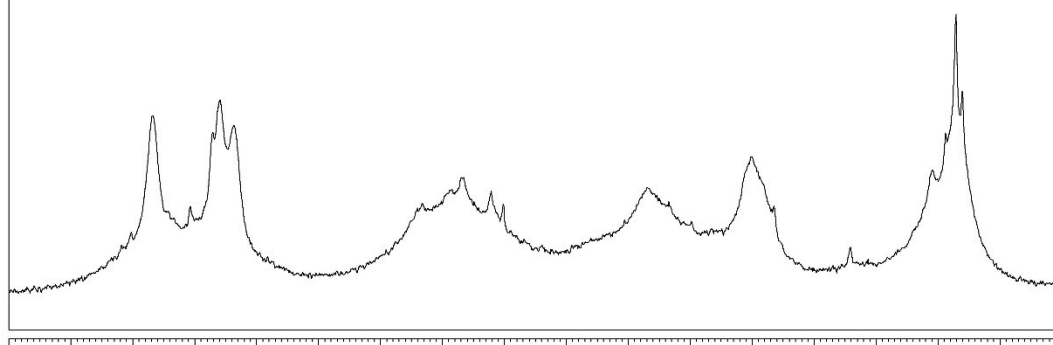

140DW

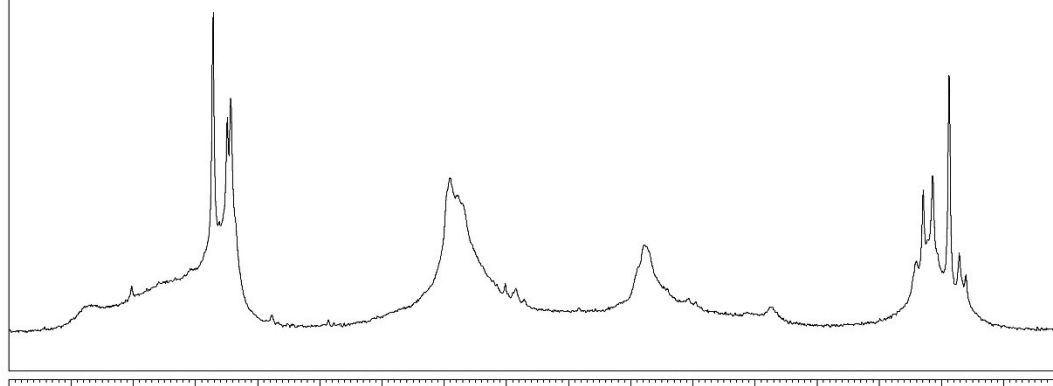

140DC

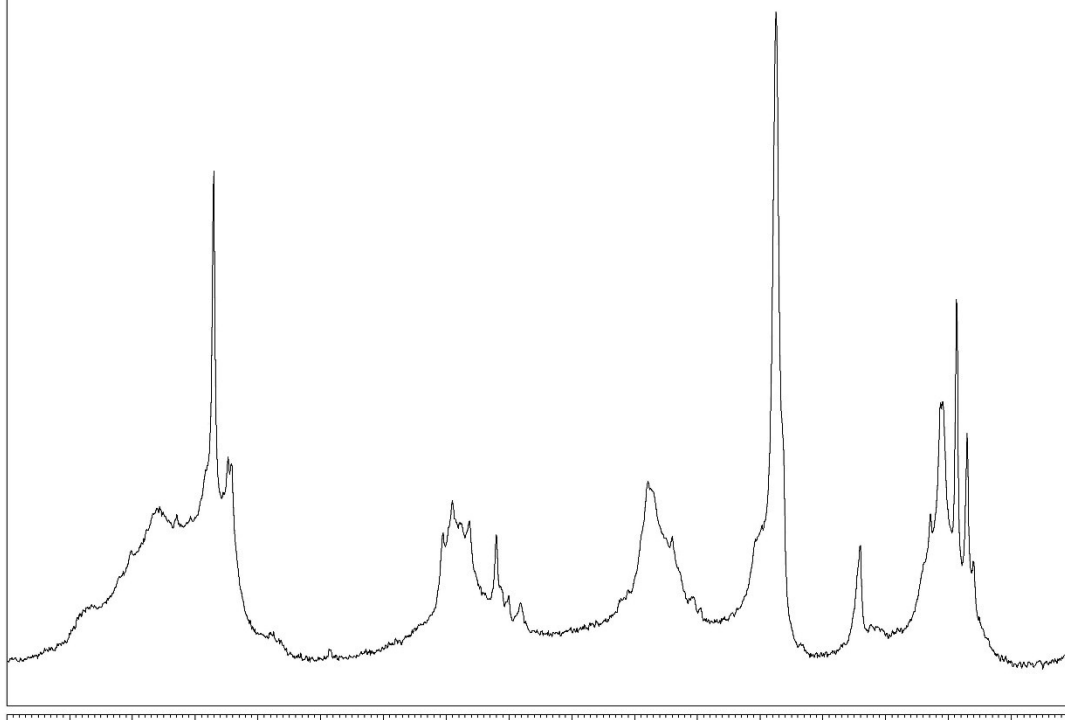

110PW

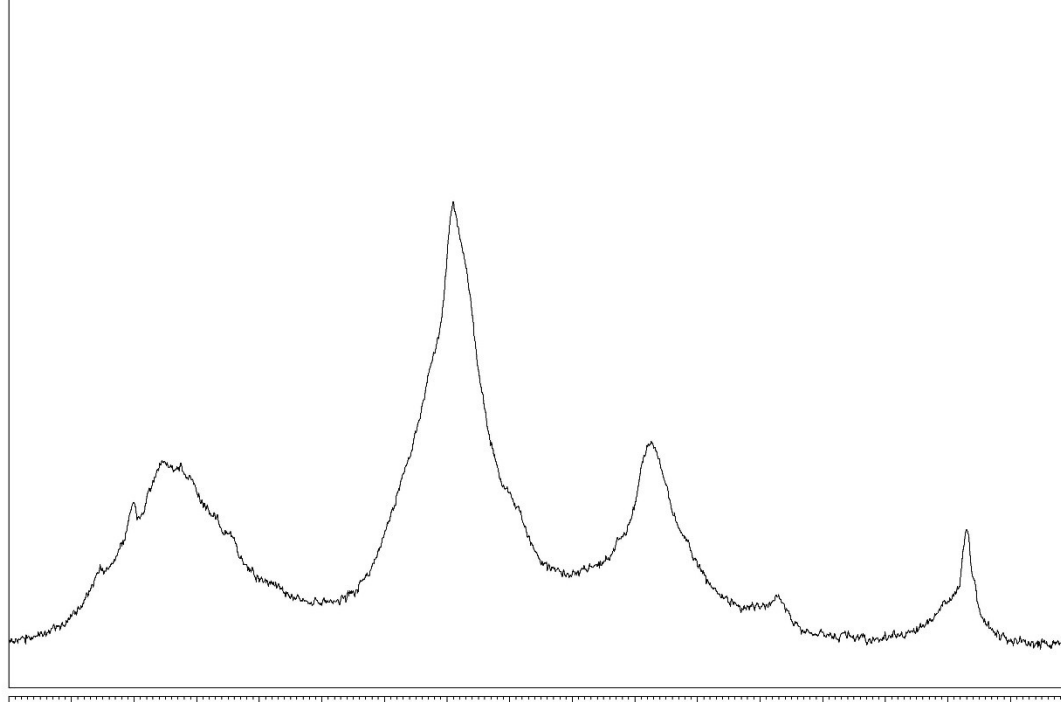

110PC

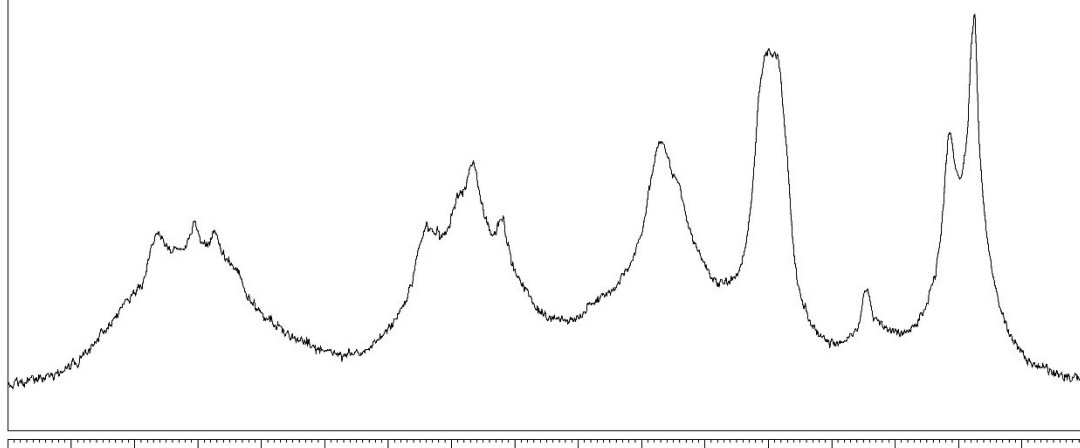

80PW

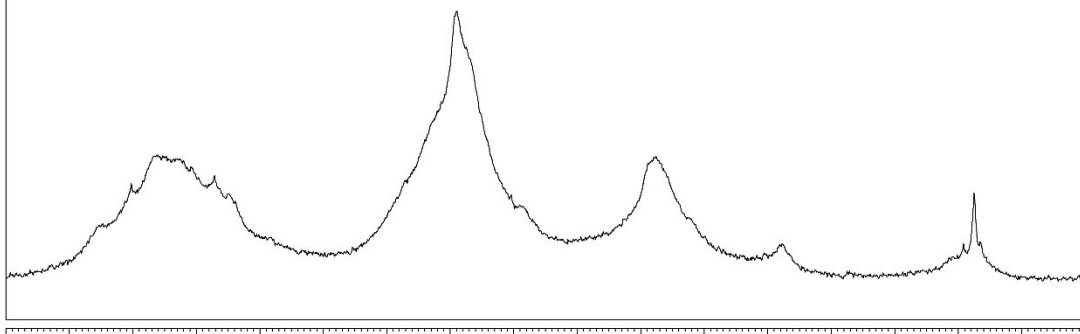

80PC

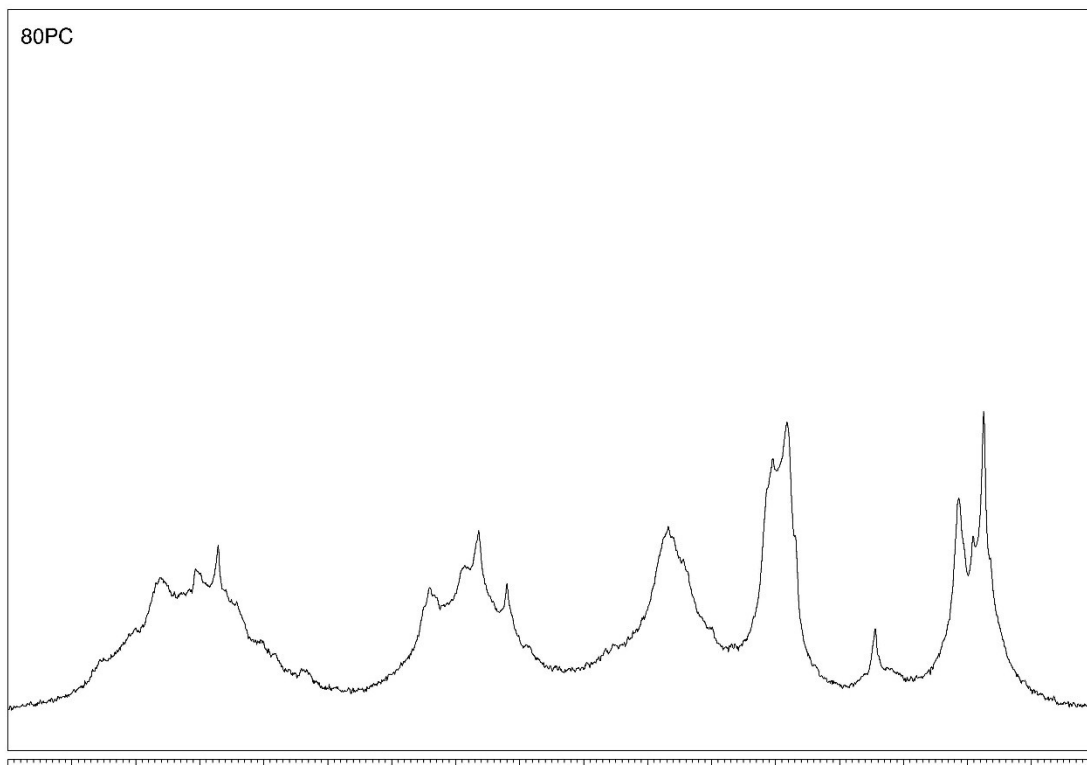

50PW

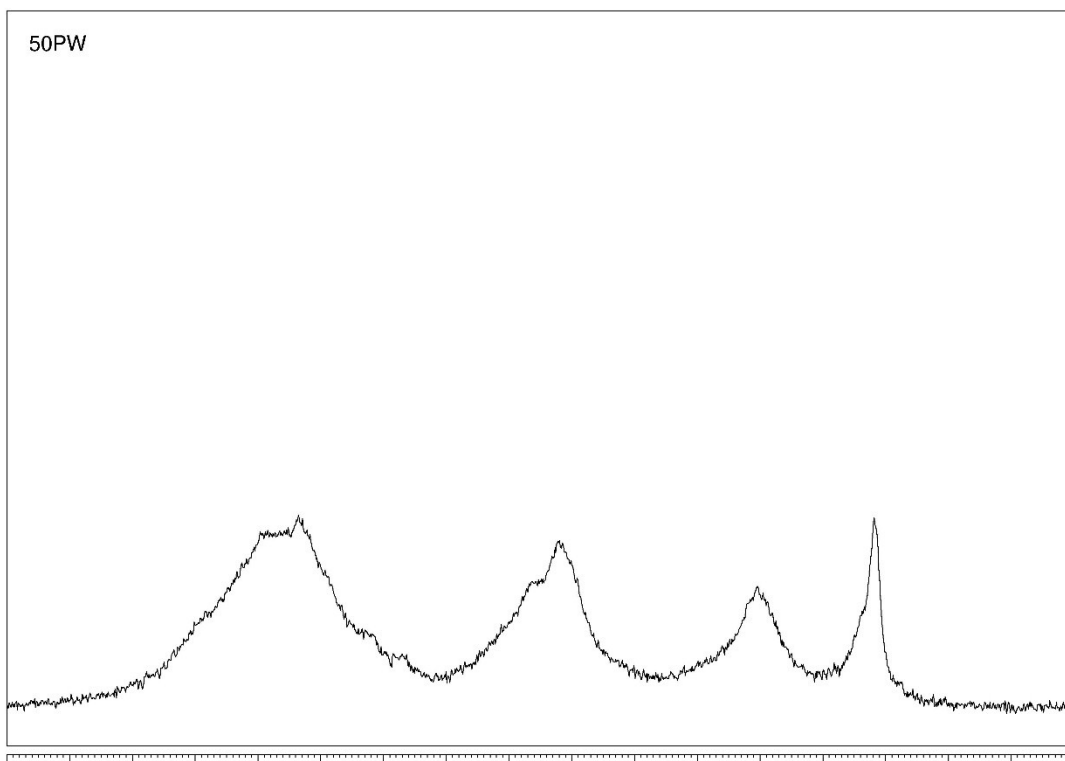

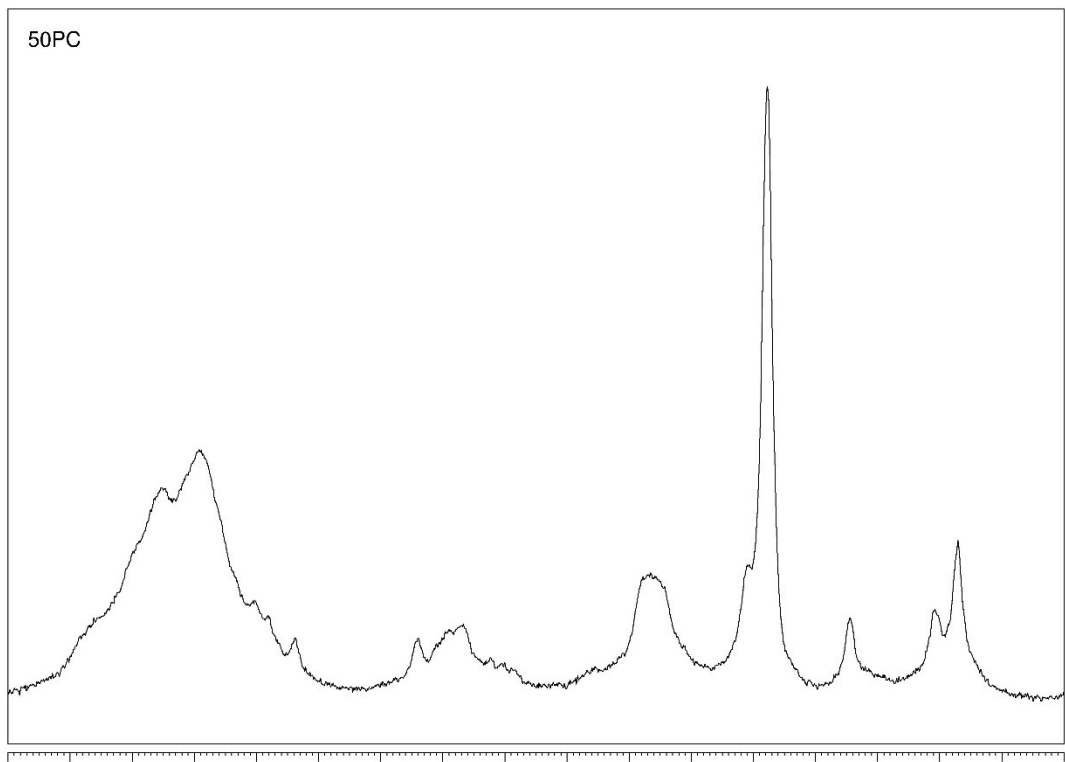

Supplement: c8se00617b1.pdf [file c8se00617b1.pdf]
